# Supplementary material for: Establishing Good Practices for Exposure–Response Analysis of Clinical Endpoints in Drug Development
Source: PubMed Central journal article supplement — CPT Pharmacometrics Syst Pharmacol. 2015 Sep 22;4(10):565–75. doi: 10.1002/psp4.12015 (PMC4625861; doi:10.1002/psp4.12015), 2015-09-22
Supplement: psp40004-0565-sd1.pdf [file psp40004-0565-sd1.pdf]

# Tutorial. Establishing Good Practices for Exposure-Response Analysis in Clinical Development

RV Overgaard, SH Ingwersen, CW Tornøe

Modelling code used for Figure 1-4. Code was for SPLUS, version 8.2 (TIBCO, Palo Alto, CA, USA)

```
#####
# Initialization
#####
remove(ls("*"))

rbinomvec=function(ns,p){
  out=rbinom(n=ns[1],size=1,prob=p[1])
  for (i in 2:length(ns))out=c(out,rbinom(n=ns[i],size=1,prob=p[i]));
  out}

invlogit = function(x) exp(x)/(1 + exp(x))

#####
# Simulation with confounding covariate (Fig 1)
#####
set.seed(2)
NperArm=500
Ntot=NperArm*2;
EC50=10

data=data.frame(ID=1:Ntot,DOSE=rep(c(0,120),each=NperArm))
data$SEX=rbinom(Ntot,size=1,prob=0.5)
data$Gender=c("Male","Female")[data$SEX+1]
data$CONC=120*(data$DOSE/240)*(1.6**data$SEX)*exp(0.4*rnorm(Ntot))
data$Response=-0.2-1.*data$CONC/(data$CONC+EC50)*(1.**data$SEX)+rnorm(Ntot)-1.2*data$SEX

True.Model=gnls(Response~EMAX*CONC/(EC50+CONC)+Intercept+sex*SEX,data=data,
params=list(EMAX~1,EC50~1,Intercept~1,sex~1),start=c(c(-2,30,1,0)),control=list(returnObject=T))
Model.wo.Covariates=gnls(Response~EMAX*CONC**h/(EC50**h+CONC**h)+Intercept,data=data,
params=list(EMAX~1,EC50~1,Intercept~1,h~1),start=c(c(-2,30,-1,1)),control=list(returnObject=T))

#####
# Simulate blood pressure (Fig 3)
#####
set.seed(3)
NperArm=240
Ntot=4*NperArm;
EC50=1

data=data.frame(ID=1:Ntot,DOSE=rep(c(0,60,120,240),each=NperArm))
data$CONC=120*(data$DOSE/240)*exp(0.3*rnorm(Ntot))
data$CBP=-1+2*data$CONC/(data$CONC+EC50)+rnorm(Ntot)

Model.BP=lm(CBP~CONC,data=data[data$DOSE!=0,])

#####
#Simulate phase 1b/2a (Fig 2)
#####
NperArm=c(16,8,8,16)
Ntot=sum(NperArm);

data=data.frame(ID=1:Ntot,DOSE=rep(c(0,60,120,240),NperArm))
data$CONC=120*(data$DOSE/240)*exp(0.3*rnorm(Ntot))
data$Response=0.3+0.075*data$CONC/mean(data$CONC)+0.3*rnorm(Ntot)

model.P1b.to.2A=lm(Response~CONC,data=data)
```

```

#####
# Simulate Phase 2b/3 (Fig 4)
#####
set.seed(1)
NperArm=rep(60,5)
Ntot=sum(NperArm);
data1=data.frame(ID=1:Ntot,DOSE=rep(c(0,30,60,120,240),NperArm))
data1[, "GRP"]="Phase 2b"

NperArm=c(160,160,320)
Ntot=sum(NperArm);
data2=data.frame(ID=1:Ntot,DOSE=rep(c(0,180,240),NperArm))
data2[, "GRP"]="Phase 3"

data=rbind(data1,data2)
Ntot=nrow(data);
data$CONC=120*(data$DOSE/240)*exp(0.3*rnorm(nrow(data)))
EC50=60
data$TRUEp=(0.30+0.45*data$CONC**2.5/(data$CONC**2.5+EC50**2.5))#+0.07*(data$GRP=="Phase 2b")
data$Response.Cat=rbinomvec(n=rep(1,Ntot),p=data$TRUEp)

Model.P2.to.P3=gnls(Response.Cat~invlogit(EMAX*CONC**h/(EC50**h+CONC**h)+Intercept),data=data,
params=list(EMAX~1,EC50~1,Intercept~GRP,h~1),start=c(c(2,60,-1,-1,2.5)),
weights=varPower(0.5,form=~fitted(.)*(1-fitted.)/1,fixed=0.5),
control=list(returnObject=T,sigma=1))

```
